# Supplementary material
Source: PubMed Central journal article supplement (PMC9451046)
Supplement: NIHMS1733498-supplement-Supp_Materials.pdf [file NIHMS1733498-supplement-Supp_Materials.pdf]

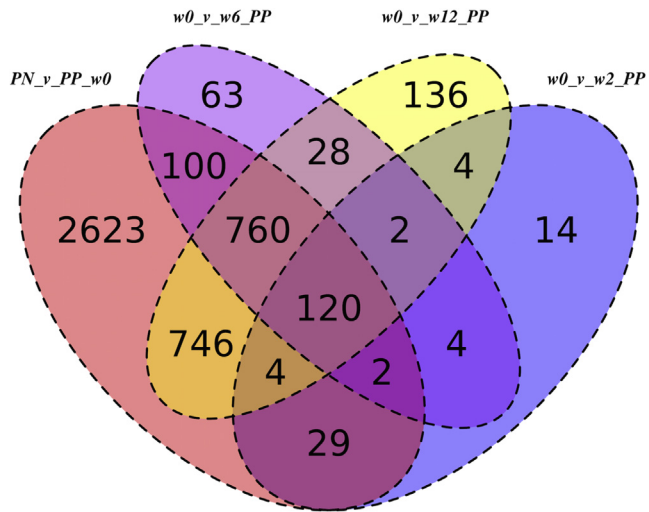

**FIG E1.** Venn diagram illustrating the overlap between differentially expressed genes identified in different comparisons. *PN*, Nonlesional skin; *PP*, lesional skin.

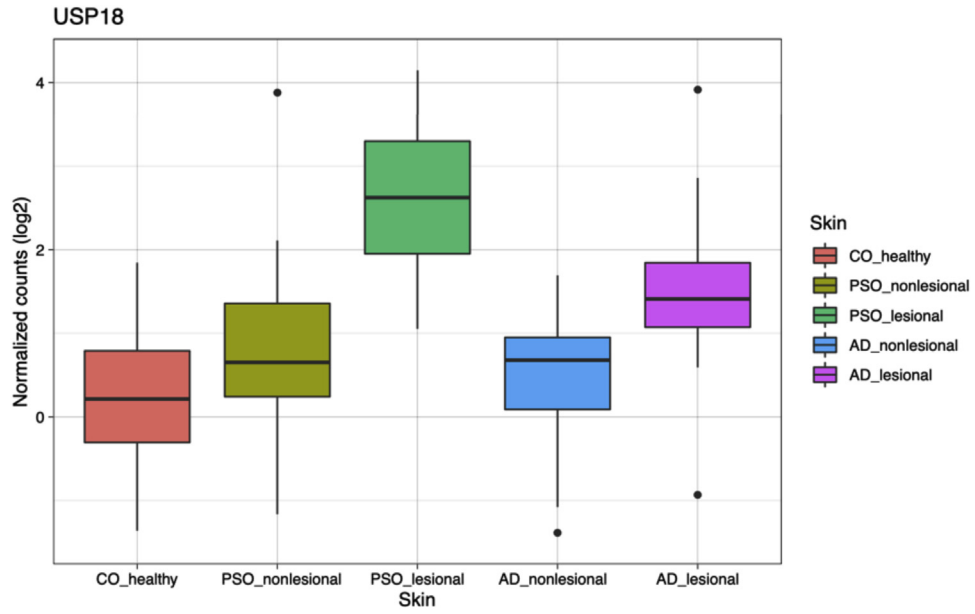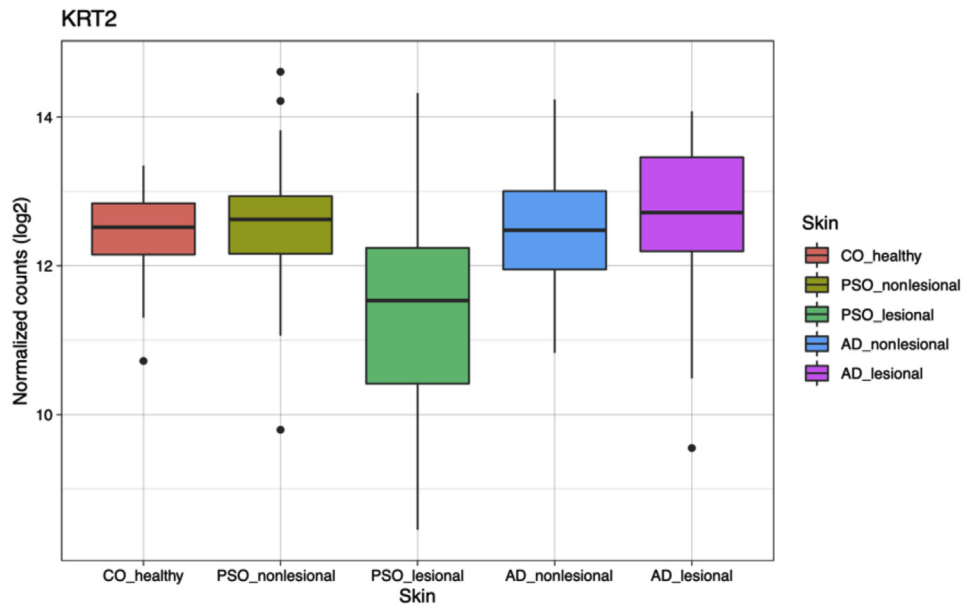

**FIG E2.** The normalized expression of *USP18* and *KRT2* in independent data set of control (CO\_healthy), uninvolved skin of psoriatic patients (PSO\_nonlesional), lesional skin of psoriatic patients (PSO\_lesional), uninvolved skin of atopic dermatitis patients (AD\_nonlesional), and lesional skin of atopic dermatitis patients (AD\_lesional).

### USP18

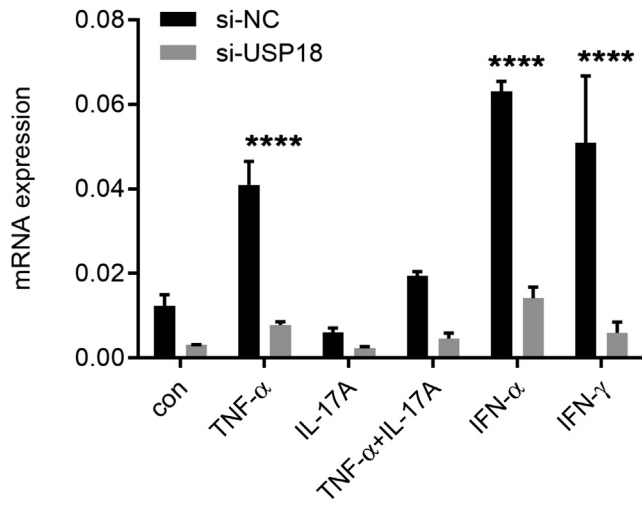

**FIG E3.** The expression of *USP18* in the knockdown experiments in different cytokine-stimulated conditions.

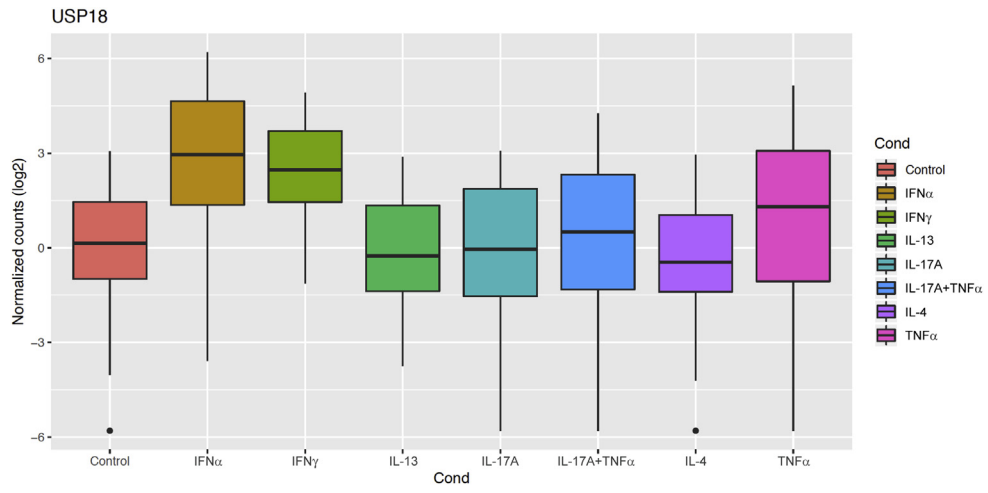

**FIG E4.** Normalized expression level of *USP18* under different cytokine stimulations in keratinocytes.

**TABLE E1.** Number of differentially expressed genes when comparing the lesional skin (PP) from baseline vs that from follow-up visits

| <b>PP week<br/>0 vs:</b> | <b>Upregulated<br/>genes</b> | <b>Downregulated<br/>genes</b> | <b>Total differential<br/>expressed genes</b> |
|--------------------------|------------------------------|--------------------------------|-----------------------------------------------|
| Week 2                   | 42                           | 109                            | 151                                           |
| Week 6                   | 508                          | 517                            | 1025                                          |
| Week 12                  | 961                          | 788                            | 1749                                          |

FDR  $\leq$  5% and 2-fold change difference were used as criteria.
